# Supplementary material for: KCNQ2 related-epilepsy: Report of nine cases and novel loss-of-function missense variants
Source: Research Square preprint supplement (doi:10.21203/rs.3.rs-1966853/v1), 2022-09-08
Supplement: Supplementary file 1 [file b10b839a2d90bdab6d8074e7.docx]

Table 1. Clinical and molecular characteristics of nine patients with *KCNQ2*-related epilepsy

| **ID** | **Sex** | **GA at birth** | **Family history** | **Seizure onset** | **Semiologies** | **EEG** | **Neuroimaging (age)** | **Antiepileptic**  **drugs** | **Age at last visit** | **Outcome** | **NGS** | **Variant (s)** | **Reported (PMID)/**  **Novel** | **Inheritance (allele from)** | **ACMG variant classification** |
| --- | --- | --- | --- | --- | --- | --- | --- | --- | --- | --- | --- | --- | --- | --- | --- |
|  |  |
| 1 | F | Term | Neg | 4 days | Spasms | NA | NA | VGB, TPM, PB, LEV, VPA | 1 Y and 8 Mo | Severe GDD | ES-trio | c.601C>T (p.Arg201Cys) | Reported (25740509) | AD  *(de novo)* | Pathogenic |
| 2 | F | Term | Neg | 2 days | GT, sequential | Multifocal IED | MRI: unremarkable | LEV Clonazepam | 9 Mo | Severe GDD | ES-trio | c.601C>T (p.Arg201Cys) | Reported (25740509) | AD  *(de novo)* | Pathogenic |
| 3 | M | Term | Neg | 3 days | Myoclonus, eyes deviate left, head turn left | Multifocal IED | MRI: unremarkable  (9 days) | LEV, PB | 1 Y and 6 Mo | Normal milestones | ES-trio | c.774C>G (p.Asn258Lys) * | Novel | *AD*  *(de novo)* | Pathogenic |
| 4 | F | Term (twin A; unaffected twin B) | Neg | 2 days | GT | Suppression-burst | MRI: cerebral atrophy, corpus callosum agenesis  (7 Mo) | PHT, PB, TPM, LEV, VGB, perampanel | 2 Y and 9 Mo | Severe GDD | GS-trio | c.821C>T (p.Thr274Met) | Reported (24318194) | AD  *(de novo)* | Pathogenic |
| 5 | F | Term | Neg | 20 hrs | GT, Multifocal clonic | Suppression-burst | CT: unremarkable | PB, LEV, TPM, perampanel | 1 Y and 7 Mo | Severe GDD | ES-trio | c.821C>T, (p.Thr274Met) | Reported (24318194) | AD  *(de novo)* | Pathogenic |
| 6 | F | Term | Neg | 1 day | GT, sequential | Suppression-burst | MRI: unremarkable  (1 Mo) | PB, LEV, TPM, PHT, Clonazepam, perampanel | 3 Y and 5 Mo | Severe GDD | ES-trio | c.836G>A (p.Gly279Asp) * | Novel | AD  *(de novo)* | Likely pathogenic |
| 7 | M | Term | Neg | 36 hrs | GT | Multifocal IED | NA | LEV, PB | 1 month | NA | ES-trio | c.881C>T | Reported (26138355) | *AD*  *(de novo)* | Pathogenic |
| (p.Ala294Val) |
|  |
| 8 | F | Term | Neg | 10 days | GT | Multifocal IED | MRI: cerebral atrophy  (11 Mo) | PB, LEV, TPM, diazepam | 3 Y and 8 Mo | Severe GDD | ES-trio | c.1657C>T (p.Arg553Trp) | Reported (32117026) | AD  *(de novo)* | Pathogenic |
| 9 | M | Term | Neg | 19 hrs | GT | Multifocal IED | MRI: unremarkable  (2 weeks) | PB, TPM, LEV, CBZ | 4 Mo | Brief eye contact/not fix and follow, head lag | ES-trio | c.1687G>A (p.Asp563Asn) | Reported (30669290) | AD  *(de novo)* | Pathogenic |

CBZ, carbamazepine; CT, computerized tomography; EEG, electroencephalogram; F, female; FLAIR, fluid attenuation inversion recovery; GDD, global developmental delay; GT, generalized tonic seizures; GTC, generalized tonic clonic seizures; rs, hours; ID, identification; IED, interictal epileptiform discharges; LEV, Levetiracetam; LGA, large for gestational age M, male; Mo, months; MRI, magnetic resonance imaging; NA, not available; NCSE, nonconvulsive status epilepticus; Neg, negative; NGS, next-generation sequencing; P5P, pyridoxal-5-phosphate; PB, phenobarbital; PHT, phenytoin; SE, status epilepticus; TPM, topiramate; VGB, vigabatrin; VPA, valproate; ES, whole-exome sequencing; GS, whole-genome sequencing; Y, year (s)

*The variants’ functional effects were studied
